# Supplementary material for: Probiotics combined with prebiotics alleviated seasonal allergic rhinitis by altering the composition and metabolic function of intestinal microbiota: a prospective, randomized, double-blind, placebo-controlled clinical trial
Source: PubMed Central journal article supplement (PMC11563974; doi:10.3389/fimmu.2024.1439830), 2024-11-01
Supplement: DataSheet1.pdf [file DataSheet1.pdf]

## Supplementary Material

### Mean changes from baseline score in clinical symptoms

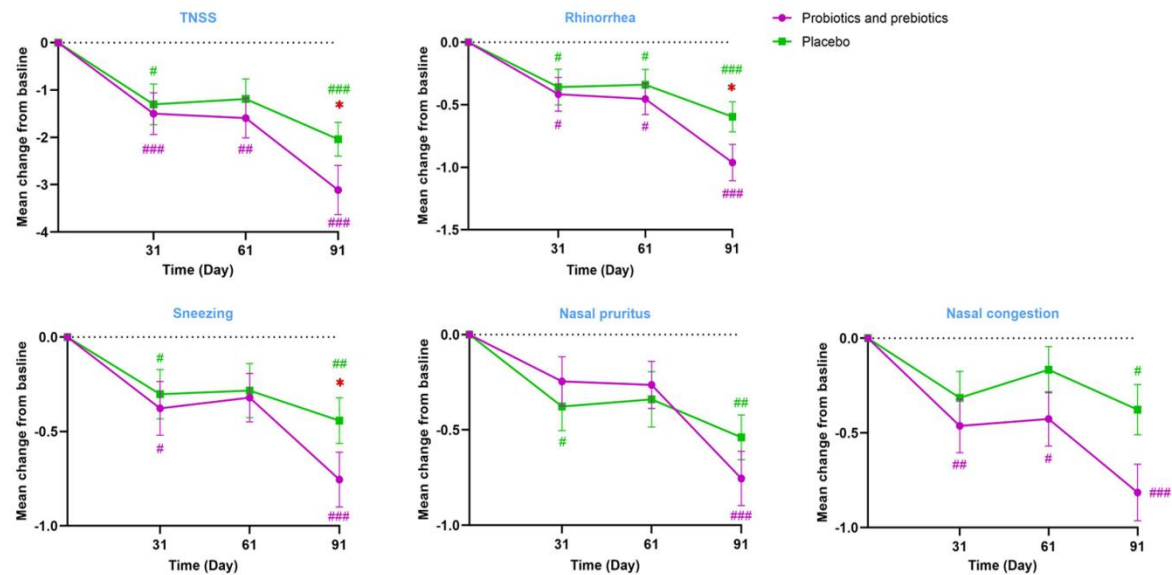

**Fig. S1** Mean change from baseline score in clinical symptoms on days 31, 61, and 91. **A**, Mean change of TNSS. **B**, Mean change of rhinorrhea. **C**, Mean change of sneezing. **D**, Mean change of nasal pruritus. **E**, Mean change of nasal congestion. Data are expressed as mean  $\pm$  SE. Covariance analysis was used to compare differences from baseline scores between the two groups. #  $P < 0.05$ , ##  $P < 0.01$ , ###  $P < 0.001$  for the difference from baseline within groups. \*  $P < 0.05$  for the difference between groups. TNSS, total nasal symptom score.

**Table S1** Differences of VAS, RQLQ and FeNO between groups and within-group

| Items      |                           | Baseline    | D31            | D61           | D91           |
|------------|---------------------------|-------------|----------------|---------------|---------------|
| VAS        | Probiotics and prebiotics | 20.2±7.5    | 15.8±7.9**     | 15.3±9.1**    | 10.8±9.7***   |
|            | Placebo                   | 20.0±8.6    | 15.1±8.4**     | 16.4±9.7*     | 13.1±7.2***   |
|            | Mean difference           |             | 0.6            | -1.1          | -2.3          |
|            | (95% confidence interval) |             | (-2.5, 3.7)    | (-4.7, 2.4)   | (-5.5, 0.8)   |
|            | <i>P</i> -Value           |             | 0.69           | 0.53          | 0.14          |
| RQLQ       | Probiotics and prebiotics | 81.6±30.4   | 65.5±28.1**    | 73.7±37.4     | 50.8±40.3***  |
|            | Placebo                   | 79.0±28.6   | 66.0±37.9      | 69.1±42.3     | 52.4±31.2***  |
|            | Mean difference           |             | -1.9           | 3.0           | -2.7          |
|            | (95% confidence interval) |             | (-13.3, 9.6)   | (-10.9, 17.0) | (-15.7, 10.2) |
|            | <i>P</i> -Value           |             | 0.75           | 0.67          | 0.68          |
| FeNO (ppb) | Probiotics and prebiotics | 492.2±239.7 | 461.0±252.3    | 454.6±183.2   | 393.1±152.7*  |
|            | Placebo                   | 520.7±236.6 | 496.3±229.1    | 456.6±181.8   | 389.3±174.0** |
|            | Mean difference           |             | -24.1          | 19.0          | 10.7          |
|            | (95% confidence interval) |             | (-112.2, 63.9) | (-46.5, 84.4) | (-49.7, 71.2) |
|            | <i>P</i> -Value           |             | 0.59           | 0.57          | 0.73          |

Data are expressed as mean ± SD. Wilcoxon rank sum test or t-test was used to compare differences in scores of VAS and RQLQ, and FeNO level from baseline within groups; covariance analysis was used to compare differences on days 31, 61, and 91 from baseline between the two groups. \*  $P < 0.05$ , \*\*  $P < 0.01$ , \*\*\*  $P < 0.001$  for the difference from baseline within groups. VAS, visual analog scale; RQLQ, rhinitis quality of life questionnaire; FeNO, fractional exhaled nitric oxide.

**Table S2 Rate and intensity of Loratadine use between groups during the trial period**

| Items                                    |                           | 0-30 days | 31-60 days | 61-90 days | 0-90 days |
|------------------------------------------|---------------------------|-----------|------------|------------|-----------|
| Rate of Loratadine use <sup>†</sup> (%)  | Probiotics and Prebiotics | 35.2      | 37.0       | 44.4       | 64.8      |
|                                          | Placebo                   | 50.0      | 46.2       | 34.6       | 63.5      |
|                                          | <i>P</i> -Value           | 0.12      | 0.34       | 0.30       | 0.88      |
| Intensity of Loratadine use <sup>‡</sup> | Probiotics and prebiotics | 0.1±0.2   | 0.3±0.6    | 0.2±0.5    | 0.2±0.4   |
|                                          | Placebo                   | 0.3±0.4   | 0.4±0.6    | 0.2±0.4    | 0.3±0.4   |
|                                          | <i>P</i> -Value           | 0.08      | 0.31       | 0.44       | 0.66      |

Data are % or mean ± SD. <sup>†</sup>, Chi-square Test; <sup>‡</sup>, Wilcoxon rank-sum test.

**Table S3 Differences in microbiota abundance between groups at phylum level**

| Species name                 | Time point                | Baseline | D31          | D61          | D91          |
|------------------------------|---------------------------|----------|--------------|--------------|--------------|
| <i>Firmicutes</i><br>(%)     | Probiotics and prebiotics | 78.7     | 56.7         | 62.3         | 64.5         |
|                              | Placebo                   | 72.9     | 73.1         | 76.1         | 73.9         |
|                              | <i>P</i> -Value           | 0.06     | <b>0.001</b> | <b>0.001</b> | <b>0.007</b> |
| <i>Actinobacteria</i><br>(%) | Probiotics and prebiotics | 12.7     | 34.8         | 31.1         | 27.3         |
|                              | Placebo                   | 16.5     | 14.1         | 12.1         | 13.5         |
|                              | <i>P</i> -Value           | 0.18     | <b>0.001</b> | <b>0.001</b> | <b>0.001</b> |

Data are expressed as mean abundance. Metastats analysis was used to compare differences between groups at different time points.

**Table S4 Differences of intestinal beneficial bacteria between groups and within-group**

| Bacteria                         |                           | Baseline | D31          | D61              | D91              |
|----------------------------------|---------------------------|----------|--------------|------------------|------------------|
| <i>Bifidobacterium</i>           | Probiotics and prebiotics | 9.8±5.6  | 13.2±4.2***  | 14.0±2.9***      | 12.1±4.8***      |
|                                  | Placebo                   | 10.9±4.7 | 10.5±5.3     | 10.9±4.1         | 10.0±5.2         |
|                                  | Mean difference           |          | 3.5          | 4.1              | 3.1              |
|                                  | (95% confidence interval) |          | (1.1, 5.9)   | (2.0, 6.1)       | (0.9, 5.2)       |
|                                  | <i>P</i> -Value           |          | <b>0.004</b> | <b>&lt;0.001</b> | <b>0.005</b>     |
| <i>Bifidobacterium animalis</i>  | Probiotics and prebiotics | 0.3±2.0  | 2.0±4.5      | 1.3±3.4          | 1.1±2.9          |
|                                  | Placebo                   | 0.8±3.0  | 0.6±2.3      | 0.2±1.3          | 0.3±1.8          |
|                                  | Mean difference           |          | 1.8          | 1.7              | 1.3              |
|                                  | (95% confidence interval) |          | (0.4, 3.3)   | (0.6, 2.7)       | (0.2, 2.4)       |
|                                  | <i>P</i> -Value           |          | <b>0.02</b>  | <b>0.002</b>     | <b>0.02</b>      |
| <i>Lactobacillus acidophilus</i> | Probiotics and prebiotics | 0.7±2.6  | 6.3±7.5***   | 7.2±7.6***       | 5.7±7.3**        |
|                                  | Placebo                   | 1.5±3.6  | 2.1±5.1      | 1.1±3.1          | 1.7±4.0          |
|                                  | Mean difference           |          | 4.7          | 6.1              | 4.2              |
|                                  | (95% confidence interval) |          | (1.9, 7.5)   | (3.6, 8.7)       | (1.8, 6.5)       |
|                                  | <i>P</i> -Value           |          | <b>0.001</b> | <b>&lt;0.001</b> | <b>&lt;0.001</b> |
| <i>Lactobacillus</i>             | Probiotics and prebiotics | 1.6±4.4  | 5.0±7.2*     | 10.0±7.4***      | 11.2±6.4***      |
|                                  | Placebo                   | 2.0±4.8  | 3.7±5.5      | 6.3±5.9          | 7.5±5.6          |
|                                  | Mean difference           |          | 1.4          | 4.1              | 4.1              |

## Supplementary Material

|                               |                           |          |             |              |              |
|-------------------------------|---------------------------|----------|-------------|--------------|--------------|
|                               | (95% confidence interval) |          | (-1.2, 4.0) | (1.3, 7.0)   | (1.6, 6.5)   |
|                               | <i>P</i> -Value           |          | 0.29        | <b>0.005</b> | <b>0.001</b> |
| <i>Bifidobacterium longum</i> | Probiotics and prebiotics | 9.2±6.5  | 12.7±5.6**  | 14.0±4.4***  | 12.7±5.7***  |
|                               | Placebo                   | 10.5±6.2 | 10.3±5.8    | 11.1±5.1     | 11.6±5.2     |
|                               | Mean difference           |          | 3.2         | 4.0          | 2.0          |
|                               | (95% confidence interval) |          | (0.3, 6.0)  | (1.3, 6.7)   | (-0.5, 4.6)  |
|                               | <i>P</i> -Value           |          | <b>0.03</b> | <b>0.005</b> | 0.12         |

Data are expressed as mean ± SD. Wilcoxon rank sum test or t-test was used to compare differences in beneficial intestinal bacteria between groups at baseline and within groups; covariance analysis was used to compare differences from baseline in beneficial intestinal bacteria between groups. \*  $P < 0.05$ , \*\*  $P < 0.01$ , \*\*\*  $P < 0.001$  for the difference from baseline within groups.

**Table S5 Differences of SCFA between groups and within-group**

| SCFA                                 |                           | Baseline        | D31                | D61                | D91                |
|--------------------------------------|---------------------------|-----------------|--------------------|--------------------|--------------------|
| Total acids<br>( $\mu\text{mol/g}$ ) | Probiotics and prebiotics | 80.6 $\pm$ 30.4 | 63.6 $\pm$ 42.4**  | 61.4 $\pm$ 33.4*** | 57.2 $\pm$ 28.7*** |
|                                      | Placebo                   | 83.4 $\pm$ 30.2 | 89.4 $\pm$ 49.6    | 83.9 $\pm$ 35.5    | 87.3 $\pm$ 49.1    |
|                                      | Mean difference           |                 | -20.3              | -21.4              | -27.5              |
|                                      | (95% confidence interval) |                 | (-38.8, -2.0)      | (-34.9, -7.9)      | (-42.7, -12.3)     |
|                                      | <i>P</i> -Value           |                 | <b>0.03</b>        | <b>0.002</b>       | <b>0.001</b>       |
| Acetate<br>(%)                       | Probiotics and prebiotics | 62.9 $\pm$ 9.1  | 79.7 $\pm$ 16.9*** | 77.6 $\pm$ 15.1*** | 74.9 $\pm$ 14.5*** |
|                                      | Placebo                   | 63.1 $\pm$ 8.4  | 63.4 $\pm$ 9.8     | 64.8 $\pm$ 7.9     | 63.7 $\pm$ 9.1     |
|                                      | Mean difference           |                 | 19.8               | 12.5               | 12.4               |
|                                      | (95% confidence interval) |                 | (13.1, 26.5)       | (6.6, 18.4)        | (7.1, 17.6)        |
|                                      | <i>P</i> -Value           |                 | <b>&lt;0.001</b>   | <b>&lt;0.001</b>   | <b>&lt;0.001</b>   |
| Propionate<br>(%)                    | Probiotics and prebiotics | 16.6 $\pm$ 6.1  | 9.9 $\pm$ 9.6***   | 10.5 $\pm$ 9.2***  | 12.1 $\pm$ 9.1*    |
|                                      | Placebo                   | 17.5 $\pm$ 7.0  | 17.9 $\pm$ 8.1     | 18.3 $\pm$ 8.4     | 18.0 $\pm$ 8.5     |
|                                      | Mean difference           |                 | -6.6               | -7.3               | -5.3               |
|                                      | (95% confidence interval) |                 | (-9.9, -3.2)       | (-10.7, -4.0)      | (-8.6, -1.9)       |
|                                      | <i>P</i> -Value           |                 | <b>&lt;0.001</b>   | <b>&lt;0.001</b>   | <b>0.002</b>       |
| Butyrate<br>(%)                      | Probiotics and prebiotics | 15.8 $\pm$ 7.3  | 8.5 $\pm$ 10.3***  | 10.2 $\pm$ 10.5*** | 10.6 $\pm$ 9.7**   |

Supplementary Material

|                 |                                           |          |              |              |               |
|-----------------|-------------------------------------------|----------|--------------|--------------|---------------|
|                 | Placebo                                   | 15.4±6.8 | 14.9±7.6     | 13.9±6.4     | 14.8±6.7      |
|                 | Mean difference                           |          | -5.6         | -3.8         | -3.9          |
|                 | (95% confidence interval)                 |          | (-9.2, -2.1) | (-7.1, -0.5) | (-7.1, -0.6)  |
|                 | <i>P</i> -Value                           |          | <b>0.002</b> | <b>0.03</b>  | <b>0.02</b>   |
| Isobutyrate (%) | Probiotics and prebiotics                 | 1.3±1.2  | 0.6±0.6***   | 0.5±0.5***   | 0.6±0.9***    |
|                 | Placebo                                   | 1.1±1.1  | 1.0±1.0      | 0.8±0.7      | 0.9±1.0       |
|                 | Mean difference                           |          | -0.5         | -0.3         | -0.3          |
|                 | (95% confidence interval)                 |          | (-0.8, -0.2) | (-0.6, -0.1) | (-0.6, 0.1)   |
|                 | <i>P</i> -Value                           |          | <b>0.001</b> | <b>0.006</b> | 0.12          |
| Valerate (%)    | Probiotics and prebiotics                 | 1.5±1.5  | 0.6±0.9***   | 0.7±1.0***   | 0.7±1.4***    |
|                 | Placebo                                   | 1.3±1.4  | 1.2±1.3      | 1.0±1.2      | 1.1±1.2       |
|                 | Mean difference                           |          | -0.6         | -0.4         | -0.4          |
|                 | (95% confidence interval)                 |          | (-1.0, -0.2) | (-0.8, 0.1)  | (-0.8, 0.007) |
|                 | <i>P</i> -Value                           |          | <b>0.003</b> | 0.09         | 0.05          |
| Isovalerate (%) | Probiotics and prebiotics                 | 2.0±1.9  | 0.8±0.8***   | 0.6±0.8***   | 1.0±1.6***    |
|                 | Placebo                                   | 1.6±1.6  | 1.5±1.4      | 1.2±1.1      | 1.5±1.8       |
|                 | Mean difference (95% confidence interval) |          | -0.6         | -0.5         | -0.4          |
|                 |                                           |          | (-1.1, -0.1) | (-1.0, 0.04) | (-1.1, 0.2)   |
|                 | <i>P</i> -Value                           |          | <b>0.02</b>  | 0.07         | 0.20          |



Data are expressed as mean  $\pm$  SD. Wilcoxon rank sum test or t-test was used to compare differences between groups at baseline and within groups; covariance analysis was used to compare differences in SCFAs from baseline between groups. \*  $P < 0.05$ , \*\*  $P < 0.01$ , \*\*\*  $P < 0.001$  for the difference from baseline within groups. SCFA, short-chain fatty acid.

16S rRNA gene sequencing data are available in the Figshare public repository (<https://doi.org/10.6084/m9.figshare.25283461>).
